# Supplementary material for: Expression of NADPH Oxidase (NOX) 5 in Rabbit Corneal Stromal Cells
Source: PubMed Central journal article supplement (PMC3325249; doi:10.1371/journal.pone.0034440), 2012-04-12
Supplement: pone.0034440.s001.pdf [file pone.0034440.s001.pdf]

| <b>Accession ID</b> | <b>Gene [Species]</b>                                                                                                                                |
|---------------------|------------------------------------------------------------------------------------------------------------------------------------------------------|
| AAK57193.1          | NADPH oxidase 5 beta [Homo sapiens]                                                                                                                  |
| NP_078781.3         | NADPH oxidase 5 isoform 1 [Homo sapiens]                                                                                                             |
| NP_001171709.1      | NADPH oxidase 5 isoform 3 [Homo sapiens]                                                                                                             |
| NP_001171708.1      | NADPH oxidase 5 isoform 2 [Homo sapiens]                                                                                                             |
| AAK57194.1          | NADPH oxidase 5 delta [Homo sapiens]                                                                                                                 |
| XP_002825647.1      | PREDICTED: NADPH oxidase 5-like isoform 2 [Pongo abelii]                                                                                             |
| XP_001085148.2      | PREDICTED: NADPH oxidase 5 [Macaca mulatta]                                                                                                          |
| XP_001495715.2      | PREDICTED: NADPH oxidase [Equus caballus]                                                                                                            |
| NP_001094607.1      | NADPH oxidase5, EF-hand calcium binding domain 5 [Bos taurus]<br>PREDICTED: NADPH oxidase, EF-hand calcium binding domain 5 [O. cuniculus]           |
| XP_002722428.1      | cuniculus]                                                                                                                                           |
| XP_002920679.1      | PREDICTED: NADPH oxidase 5-like [Ailuropoda melanoleuca]                                                                                             |
| EFB19538.1          | hypothetical protein PANDA_009435 [Ailuropoda melanoleuca]                                                                                           |
| EFN89636.1          | NADPH oxidase 5 [Harpegnathos saltator]                                                                                                              |
| ABV44289.1          | NADPH oxidase EF-hand calcium binding domain protein 5 [Ovis aries]<br>superoxide-generating NADPH oxidase flavocytochrome [Dictyostelium purpureum] |
| EGC36287.1          | purpureum]                                                                                                                                           |
| XP_001921894.1      | PREDICTED: predicted NADPH oxidase 5-like [Danio rerio]                                                                                              |
| FAA00348.1          | TPA: predicted NADPH oxidase [Apis mellifera]                                                                                                        |
| NP_001093755.1      | NADPH oxidase 5 [Gallus gallus]                                                                                                                      |
| NP_001097336.1      | NADPH oxidase [Drosophila melanogaster]                                                                                                              |
| FAA00347.1          | TPA: predicted NADPH oxidase [Anopheles gambiae]                                                                                                     |
